# Supplementary material for: Structural and thermal analysis of a hyper-branched exopolysaccharide produced by submerged fermentation of mushroom mycelium
Source: Royal Society of Chemistry journal article supplement (doi:10.1039/c6ra23383j), 2016-01-01
Supplement: c6ra23383j1.pdf [file c6ra23383j1.pdf]

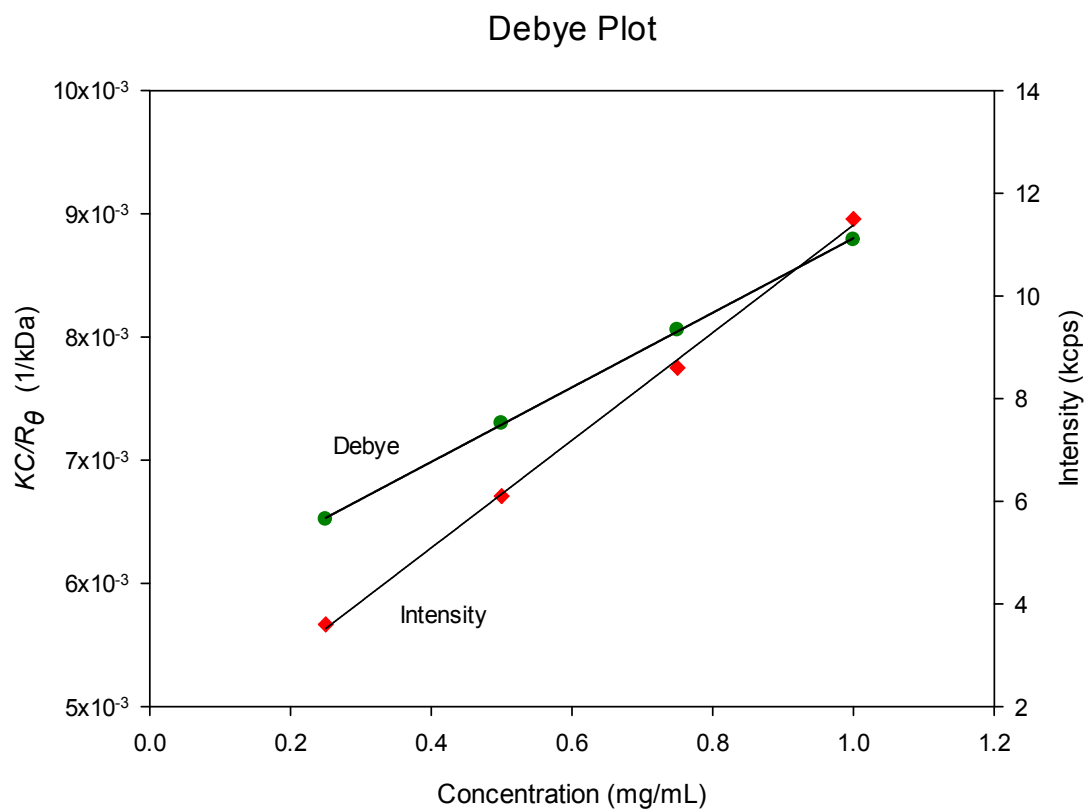

1

2 **Figure S1.** Debye plot of PTR-EPS1.

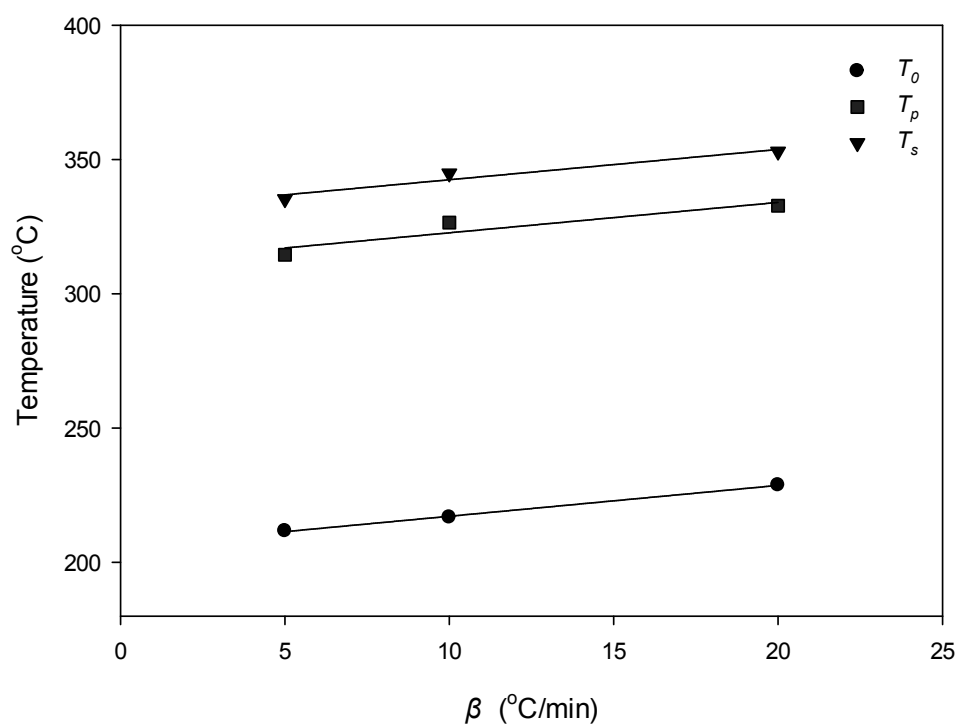

3

4 **Figure S2.** Thermal degradation parameters of PTR-EPS1 at different heating rates.

5
